# Supplementary material for: Genome-wide profiling identifies associations between lupus nephritis and differential methylation of genes regulating tissue hypoxia and type 1 interferon responses
Source: PubMed Central journal article supplement — Lupus Sci Med. 2016 Dec 7;3(1):e000183. doi: 10.1136/lupus-2016-000183 (PMC5174796; doi:10.1136/lupus-2016-000183), 2016-12-07
Supplement: lupus-2016-000183supp_tables.pdf [file lupus-2016-000183supp_tables.pdf]

**Supplemental Table 1.** Number of SNPs with evidence of association with methylation of sites associated with lupus nephritis.

| CpG               | Gene                              | # SNPs tested | # SNPs regression p<0.05 | # SNPs FDR q<0.05 |
|-------------------|-----------------------------------|---------------|--------------------------|-------------------|
| <b>cg15262954</b> | <i>HELZ2</i>                      | <b>37</b>     | <b>4</b>                 | <b>1</b>          |
| cg19168338        | <i>CORO7</i>                      | 18            | 1                        | 0                 |
| cg00356916        | <i>CASQ2</i>                      | 26            | 0                        | 0                 |
| cg01079652        | <i>IFI44</i>                      | 57            | 2                        | 0                 |
| cg05883128        | <i>DDX60</i>                      | 51            | 0                        | 0                 |
| cg25114611        | <i>FKBP5;</i><br><i>LOC285847</i> | 26            | 6                        | 0                 |
| <b>cg22891070</b> | <i>HIF3A</i>                      | <b>49</b>     | <b>13</b>                | <b>3</b>          |
| cg05552874        | <i>IFIT1</i>                      | 49            | 4                        | 0                 |
| cg18468088        | No gene w/in 5KB                  | 49            | 5                        | 0                 |
| cg00791854        | <i>IL6R</i>                       | 23            | 2                        | 0                 |
| cg23510764        | No gene w/in 5kb                  | 28            | 0                        | 0                 |
| cg02812482        | No gene w/in 5kb                  | 16            | 1                        | 0                 |
| <b>cg04845871</b> | <i>MIR-29B-2, LOC148696</i>       | <b>49</b>     | <b>12</b>                | <b>1</b>          |
| <b>cg23256579</b> | <i>PRR4</i>                       | <b>27</b>     | <b>14</b>                | <b>13</b>         |
| <b>cg16672562</b> | <i>HIF3A</i>                      | <b>49</b>     | <b>14</b>                | <b>4</b>          |
| cg16032408        | <i>SLC6A6</i>                     | 92            | 1                        | 0                 |
| cg13437525        | <i>METTL7A</i>                    | 30            | 3                        | 0                 |
| cg14519664        | <i>MLLT3</i>                      | 39            | 1                        | 0                 |
| cg10959651        | <i>RSAD2</i>                      | 65            | 0                        | 0                 |

**Supplemental Table 2.** Association between methylation status and lupus nephritis adjusting for SNPs. “No SNP” results reflect the association observed between methylation of the site and lupus nephritis as presented in Table 1 and are included for reference.

| CpG        | Gene                          | SNP        | SNP association results                 |                    |             | Lupus nephritis association results |                    |
|------------|-------------------------------|------------|-----------------------------------------|--------------------|-------------|-------------------------------------|--------------------|
|            |                               |            | Regression coefficient for SNP (95% CI) | Regression p-value | FDR q-value | $\beta$ (95% CI)                    | Regression p-value |
| cg15262954 | <i>HELZ2</i>                  | rs1151621  | 0.011 (0.005 to 0.016)                  | 2.66E-04           | 0.01        | 0.014 (0.009 to 0.019)              | 1.65E-07           |
|            |                               | No SNP     |                                         |                    |             | 0.014 (0.009 to 0.019)              | 2.84E-08           |
| cg22891070 | <i>HIF3A</i>                  | rs2072491  | -0.06 (-0.97 to -0.023)                 | 1.79E-03           | 0.029       | -0.094 (-0.132 to -0.055)           | 2.56E-06           |
|            |                               | rs10412620 | -0.046 (-0.068 to -0.023)               | 9.79E-05           | 0.002       | -0.108 (-0.146 to -0.071)           | 3.70E-08           |
|            |                               | rs11880808 | 0.051 (0.027 to 0.074)                  | 3.33E-05           | 0.002       | -0.109 (-0.146 to -0.072)           | 2.62E-08           |
|            |                               | No SNP     |                                         |                    |             | -0.094 (-0.130 to -0.058)           | 5.69E-07           |
| cg16672562 | <i>HIF3A</i>                  | rs2072491  | -0.07 (-0.108 to -0.033)                | 2.91E-04           | 0.007       | -0.091 (-0.130 to -0.053)           | 5.49E-06           |
|            |                               | rs10412620 | -0.042 (-0.066 to -0.019)               | 4.63E-04           | 0.007       | -0.106 (-0.145 to -0.068)           | 1.20E-07           |
|            |                               | rs11880808 | 0.05 (0.026 to 0.074)                   | 6.02E-05           | 0.003       | -0.107 (-0.146 to -0.070)           | 7.02E-08           |
|            |                               | rs16980543 | -0.059 (-0.098 to -0.021)               | 2.99E-03           | 0.035       | -0.102 (-0.141 to -0.064)           | 3.67E-07           |
|            |                               | No SNP     |                                         |                    |             | -0.092 (-0.129 to -0.055)           | 1.55E-06           |
| cg04845871 | <i>MIR-29B-2b, LOC148696b</i> | rs2076221  | 0.010 (0.005 to 0.016)                  | 4.78E-04           | 0.023       | 0.020 (0.012 to 0.028)              | 8.98E-07           |
|            |                               | No SNP     |                                         |                    |             | 0.019 (0.012 to 0.027)              | 1.22E-06           |
| cg23256579 | <i>PRR4</i>                   | rs10772380 | 0.026 (0.012 to 0.041)                  | 5.00E-04           | 0.007       | -0.050 (-0.070 to -0.030)           | 1.66E-06           |
|            |                               | rs1015443  | 0.025 (0.013 to 0.037)                  | 5.16E-05           | 0.003       | -0.054 (-0.074 to -0.035)           | 1.71E-07           |
|            |                               | rs10845242 | 0.026 (0.014 to 0.038)                  | 2.72E-05           | 0.003       | -0.055 (-0.074 to -0.035)           | 1.36E-07           |
|            |                               | rs10492102 | 0.028 (0.014 to 0.043)                  | 1.86E-04           | 0.005       | -0.050 (-0.070 to -0.030)           | 2.19E-06           |
|            |                               | rs3851583  | 0.028 (0.014 to 0.043)                  | 2.05E-04           | 0.005       | -0.049 (-0.069 to -0.029)           | 2.31E-06           |
|            |                               | rs10845252 | 0.026 (0.012 to 0.041)                  | 5.00E-04           | 0.007       | -0.050 (-0.070 to -0.030)           | 1.65E-06           |

|            |                          |          |       |                           |          |
|------------|--------------------------|----------|-------|---------------------------|----------|
| rs7307031  | -0.02 (-0.033 to -0.007) | 3.50E-03 | 0.028 | -0.057 (-0.077 to -0.037) | 8.57E-08 |
| rs10845279 | -0.02 (-0.033 to -0.007) | 3.50E-03 | 0.028 | -0.057 (-0.077 to -0.036) | 1.01E-07 |
| rs12226919 | -0.02 (-0.033 to -0.007) | 3.50E-03 | 0.028 | -0.057 (-0.077 to -0.037) | 8.57E-08 |
| rs12226920 | -0.02 (-0.033 to -0.007) | 3.67E-03 | 0.028 | -0.057 (-0.077 to -0.036) | 1.05E-07 |
| rs7135018  | 0.028 (0.013 to 0.044)   | 3.89E-04 | 0.007 | -0.049 (-0.069 to -0.028) | 4.42E-06 |
| rs12581501 | 0.025 (0.009 to 0.040)   | 2.00E-03 | 0.025 | -0.053 (-0.073 to -0.033) | 4.23E-07 |
| rs4298989  | -0.02 (-0.033 to -0.007) | 3.50E-03 | 0.028 | -0.057 (-0.077 to -0.037) | 8.57E-08 |
| No SNP     |                          |          |       | -0.050 (-0.070 to -0.030) | 1.41E-06 |

---

\*  $\beta$  represents the difference in methylation between SLE cases with nephritis and SLE cases without nephritis adjusted for disease duration, population substructure, mixed cell populations, and listed SNP if indicated.
